# Supplementary figures and images for: Copper oxide nanoparticles in an epoxy network: microstructure, chain confinement and mechanical behaviour
Source: Royal Society of Chemistry journal article supplement (doi:10.1039/c6cp02361d), 2016-01-01

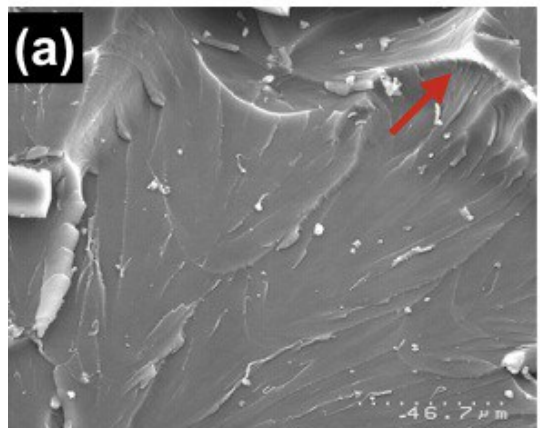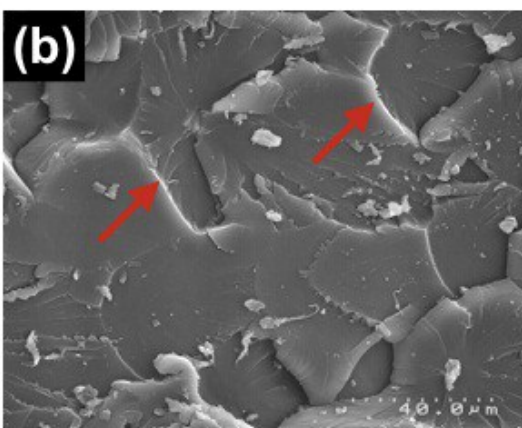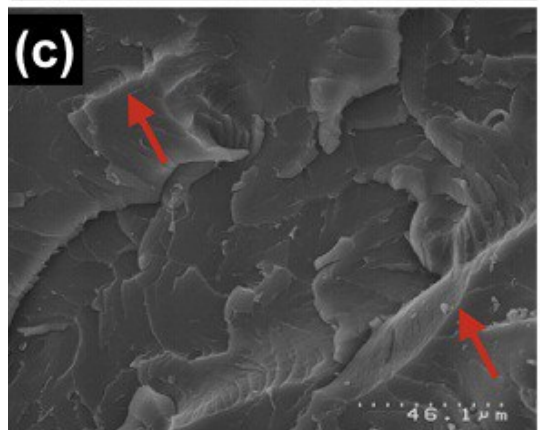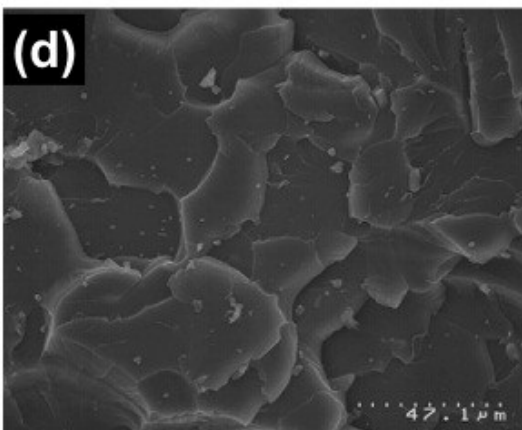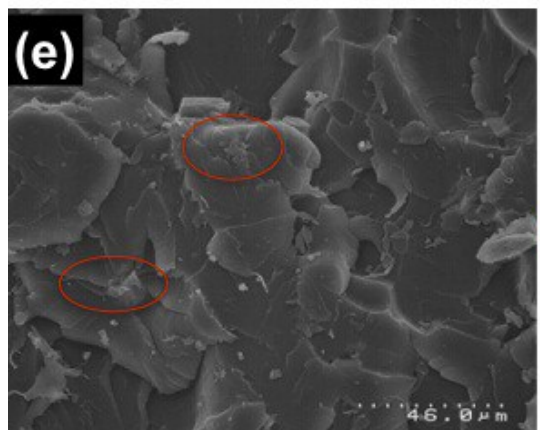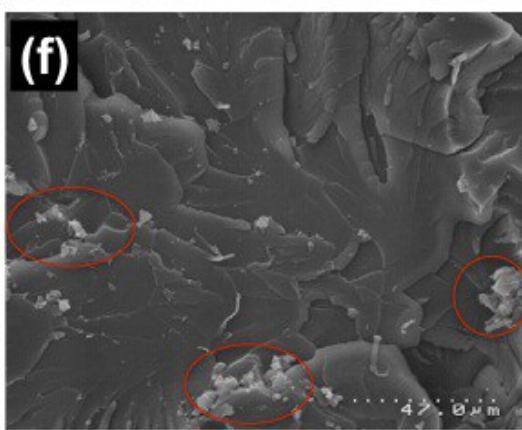

Supplement: c6cp02361d2.pdf [file c6cp02361d2.pdf]
